# Supplementary material for: Childhood lung function following perinatal HIV infection and early antiretroviral therapy initiation: a cross-sectional study
Source: PubMed Central journal article supplement — ERJ Open Res. 2022 Mar 21;8(1):00691-2021. doi: 10.1183/23120541.00691-2021 (PMC8943286; doi:10.1183/23120541.00691-2021), 2022-03-21
Supplement: 00691-2021.SUPPL_METHODS.pdf [file 00691-2021.SUPPL_METHODS.pdf]

**Supplementary methodology: Childhood lung function following perinatal HIV infection and early antiretroviral initiation; a cross-sectional study**

Anthropometry was performed using standardized methods prior to lung function testing.

- 1) Weight was measured with a calibrated scale with the participant wearing light underclothes.
- 2) Standing height was measured with a stadiometer when the participant was not wearing shoes.
